# Supplementary material for: Loss of males from mixed-sex societies in termites
Source: PubMed Central journal article supplement (PMC6154949; doi:10.1186/s12915-018-0563-y), 2018-09-25

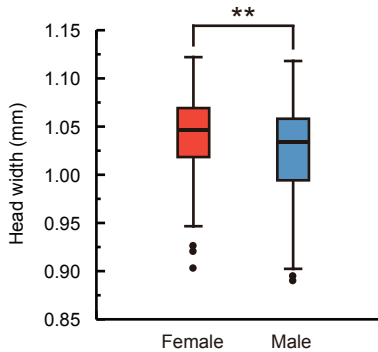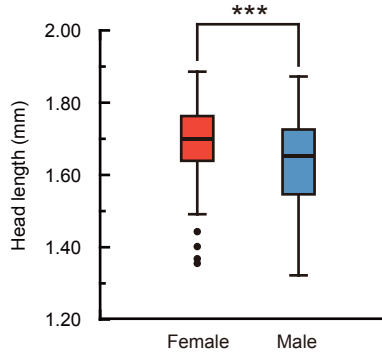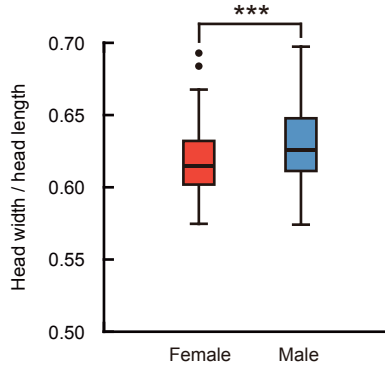

Supplement: 12915_2018_563_MOESM3_ESM.pdf [file 12915_2018_563_MOESM3_ESM.pdf]
